# Supplementary material for: Development of B. carinata with super-high erucic acid content through interspecific hybridization
Source: PubMed Central journal article supplement (PMC8440251; doi:10.1007/s00122-021-03883-2), 2021-07-16
Supplement: 122_2021_3883_MOESM1_ESM.pdf [file 122_2021_3883_MOESM1_ESM.pdf]

Online Resource 1: Primer pairs used in this study to amplify fatty acid-related genes in *Brassica*

---

| Primer name | Sequence                                               |
|-------------|--------------------------------------------------------|
| FAE F       | CATTACGTCATAACCAACC                                    |
| FAE R       | GCTAGATGAAGTGTTTCCAG                                   |
| FAE KASP A1 | GAAGGTGACCAAGTTCATGCTGAAAATCTATTCA<br>AGAACACCAACGTTAG |
| FAE KASP A2 | GAAGGTGCGGAGTCAACGGATTGAAAATCTATTCA<br>AGAACACCAATGTAA |
| FAE KASP C  | GAGTTCACCACAAGTATACCTATATCTTTA                         |
| fad2B F     | CTCGGGCAGACCTTACCCCGAG                                 |
| fad2B R     | GTCCCATCGAACTGGTAATAGTC                                |
| fad2B F2    | GCTTCTCGTAAGCATCACGAG                                  |
| fad2b R2    | AGGTTTCGAAGATTCAACTTC                                  |

---
